# Supplementary material
Source: publisher figshare collection journal article supplement (https://springernature.figshare.com/ndownloader/files/22105287)
Supplement: Supplementary file 1 [file 22105287]

**Appendix 1**: Stata do-file to generate Xin Liu’s class framework for society in transitional China using 2010 CGSS

**When you refer to this do-file or part of it, please cite as:

**Liu, Xin. 2020. “Class structure and Income Inequality in Transitional China.”

**The Journal of Chinese Sociology 2020: DOI : 10.1186/s40711-020-00116-9.

defv risco59 =risco881

defv risco60 =risco882

defv rwkexp =a58

forvalues i = 59/60 {

defv emplmtst`i' =a`i'a

defv nemplee`i' =a`i'aa

defv authrnk`i' =a`i'e

defv manager`i' =a`i'f

defv subordinate`i' =a`i'fa

defv unitype`i' =a`i'j

defv sector`i' =3

replace sector`i' =. if (a`i'j>=-3 & a`i'j<=-1) & (a`i'k>=-3 & a`i'k<=-1)

replace sector`i' =2 if a`i'j==2 & (a`i'k==1 | a`i'k==2)

replace sector`i' =1 if (a`i'j==3 | a`i'j==4) & (a`i'k==1 | a`i'k==2)

replace sector`i' =1 if (a`i'j==1 | a`i'j==6)

recode risco`i' (1000 1100 1110 1120 1140/1143 1251=2) ///

(1200 1210 1220 1222/1229 1230/1239=4) ///

(100 110 1240 1250 1252=5) (3300 3310 3320 3330 3340 3430 3433 3439=5) ///

(3442/3444 3452 4000 4100 4115 4120/4122 4130/4133 4140/4144 4190 4200=5) ///

(4210/4215 4220/4222 5113 5161 5162/5164 5200 5210 5220 5230=5) ///

(1300 1310 1312/1319=10) ///

(1130 6110 6131/6133=11) ///

(2000 2100 2110/2114 2120/2122 2200 2210/2213 2310 2440/2443 2445=12) ///

(2140/2147 2149 2220/2222 2224 2229 2300 2351 2411 2420/2422 2429=13) ///

(2444 2446 2450/2455 3143 3144 3450 3451=13) ///

(2130/2132 2139 2148 2223 2230 2320/2322 2330/2332 2340 2350 2352 2359=14) ///

(2400 2410 2412 2419 2430/2432 2460 2470 3000 3100 3110/3123 3130/3133=14) ///

(3139 3140/3142 3145 3150/3152 3200 3210/3213 3220/3232 3240/3242 3400=14) ///

(3410/3417 3419 3420/3423 3429 3431 3432 3434 3440 3441 3449 3460 3470=14) ///

(3471/3475 3480=14) ///

(1221 1311 4110/4114 4223 5000 5100 5110/5112 5122 5141 5143 5150/5152=15) ///

(6000 6100 6111/6114 6120/6124 6129 6130 6134 6140/6142 6150/6154 6200=15) ///

(6210 7000 7120 7124 7129 7130 7132/7134 7136 7137 7140 7141 7200=15) ///

(7210/7216 7220/7224 7230/7233 7240/7245 7300 7310/7313 7323 7324=15) ///

(7340/7346 7400 7410/7416 7420 7422 7423 7430 7433/7437 7440/7442 7500=15) ///

(7510 7520 7900 8150/8155 8159 8160/8163 8170/8172 8311 8331/8333 9200=15) ///

(9210/9213=15) ///

(5120/5123 5129 5130/5133 5139 5140 5142 5149 5160 5169 7100=16) ///

(7110/7113 7121/7123 7131 7135 7142 7143 7234 7320/7322 7330/7332=16) ///

(7421 7424 7431 7432 7530 8000 8100 8110/8113 8120/8124 8130 8131=16) ///

(8139 8140/8143 8200 8210/8212 8220/8224 8229 8230/8232 8240 8250=16) ///

(8251/8253 8260/8266 8269 8270/8286 8290 8300 8310 8312 8320/8324=16) ///

(8330 8334 8340 8400 9000 9100 9110/9113 9120 9130/9133 9140/9142=16) ///

(9150/9153 9160/9162 9300 9310/9313 9320/9322 9330/9333=16) ///

(0 8888 9999=.), gen (lxclass16`i')

}

replace lxclass1659=11 if (rwkexp>=2 & rwkexp<=4)

forvalues i = 59/60 {

replace lxclass16`i'=2 if sector`i'==1 & (authrnk`i'>=2 & authrnk`i'<=4)

replace lxclass16`i'=1 if sector`i'==1 & (authrnk`i'>=5 & authrnk`i'<=7)

replace lxclass16`i'=4 if sector`i'==2 & (authrnk`i'>=2 & authrnk`i'<=4)

replace lxclass16`i'=3 if sector`i'==2 & (authrnk`i'>=5 & authrnk`i'<=7)

replace lxclass16`i'=9 if sector`i'==3 & (manager`i'==1 | manager`i'==2) & subordinate`i'>=10

replace lxclass16`i'=10 if sector`i'==3 & (manager`i'==1 | manager`i'==2) & (subordinate`i'>=1 & subordinate`i'<=9)

replace lxclass16`i'=8 if (emplmtst`i'==1 | emplmtst`i'==2) & (nemplee`i'==0 | nemplee`i'==1)

replace lxclass16`i'=7 if (emplmtst`i'==1 | emplmtst`i'==2) & (nemplee`i'>=2 & nemplee`i'<=9)

replace lxclass16`i'=6 if (emplmtst`i'==1 | emplmtst`i'==2) & nemplee`i'>=10

}

gen lxclass16=lxclass1659

replace lxclass16=lxclass1660 if lxclass16==.

recode lxclass16 (1=1)(2=2)(3=1)(4=2)(5=3)(6=1)(7=4)(8=4)(9=2) ///

(10=3)(11=7)(12=1)(13=2)(14=3)(15=5)(16=6),gen (lxclass7)

label variable lxclass16 "Xin Liu's Class Framework with 16 Class Positions"

label define lxclass16 ///

1 "Middle & higher level cadre" ///

2 "Below middle level cadre" ///

3 "SOE middle & higher level manager" ///

4 "SOE lower level manager & supervisor" ///

5 "Administrative staff & clerk" ///

6 "Private owner with 10 or more employees" ///

7 "Private owner with 2-9 employees" ///

8 "The self-employed" ///

9 " Higher level private manager with 10 or more subordinates" ///

10 "Lower level private manager with 1-9 subordinates" ///

11 "Household contractor of rural collective economy" ///

12 "Higher level professional" ///

13 "Middle level professional" ///

14 "Lower level & associate professional" ///

15 "Skilled worker" ///

16 "Unskilled worker"

label values lxclass16 lxclass16

label variable lxclass7 "Xin Liu's 7 Class Scheme"

label define lxclass7 ///

1 "Command class" ///

2 "Upper middle class" ///

3 "Lower middle class" ///

4 "Small owner & the self-employed" ///

5 "Skilled worker" ///

6 "Unskilled worker" ///

7 "Farmer"

label values lxclass7 lxclass7

drop rwkexp *59 *60
